# Supplementary material for: Highly Efficient Solution-Processed Bluish-Green Thermally Activated Delayed Fluorescence Compounds Using Di(pyridin-3-yl)methanone as Acceptor
Source: MDPI journal article supplement (doi:10.3390/photonics10040456), 2023-04-14
Supplement: s1 [file s1]

# Contents

- 1) **Figure S1.** TGA and DSC curves of ACCz-DPyM and POxCz-DPyM.
- 2) **Figure S2.** The AFM topographic images of the solution-processed ACCz-DPyM and POxCz-DPyM films.
- 3) **Figure S3.** CV of ACCz-DPyM and POxCz-DPyM in CH<sub>2</sub>Cl<sub>2</sub> solution.
- 4) **Figure S4.** <sup>1</sup>H NMR spectrum of ACCz-DPyM.
- 5) **Figure S5.** <sup>13</sup>C NMR spectrum of ACCz-DPyM.
- 6) **Figure S6.** HRMS spectrum of ACCz-DPyM.
- 7) **Figure S7.** <sup>1</sup>H NMR spectrum of POxCz-DPyM.
- 8) **Figure S8.** <sup>13</sup>C NMR spectrum of POxCz-DPyM.
- 9) **Figure S9.** HRMS spectrum of POxCz-DPyM.

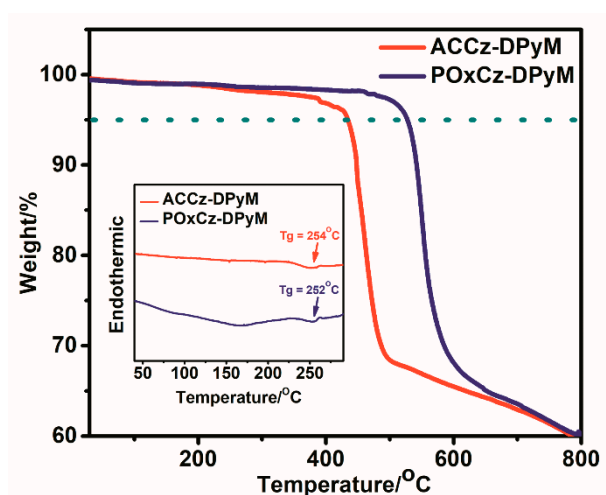

**Figure S1.** TGA and DSC curves of ACCz-DPyM and POxCz-DPyM.

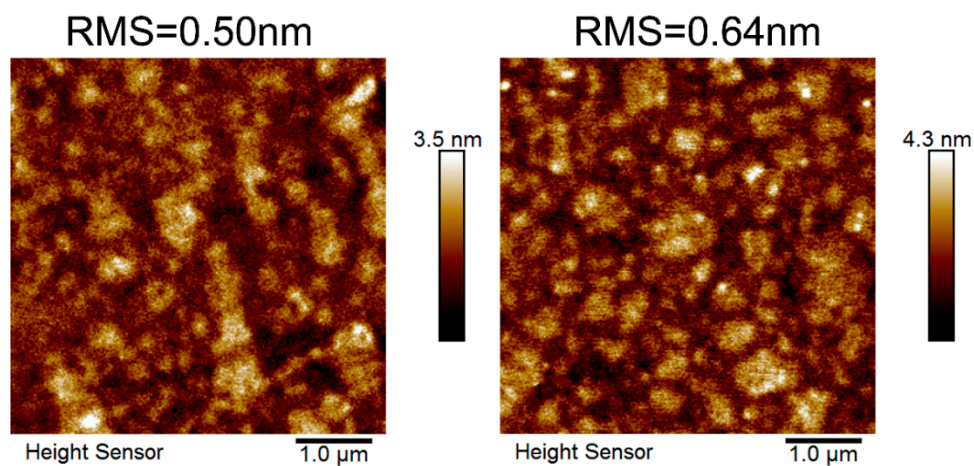

<sup>1</sup>H NMR spectrum of compound **1** in CDCl<sub>3</sub>. The spectrum shows peaks from 0 to 10 ppm. The aromatic region (6.5-9.5 ppm) contains several multiplets and doublets. The aliphatic region (1.5-3.5 ppm) shows a large singlet for the methyl groups. Integration values are provided below the peaks.

Chemical structure of compound **1** is shown above the spectrum.

Peak list (ppm): 9.356, 9.351, 8.740, 8.734, 8.719, 8.713, 8.472, 8.468, 8.426, 8.404, 8.334, 7.571, 7.545, 7.508, 7.506, 7.489, 7.488, 6.957, 6.936, 6.907, 6.888, 6.870, 6.280, 6.259, 1.644.

Integration values: 2.00, 2.00, 4.00, 4.00, 2.00, 4.00, 8.00, 8.02, 8.00, 8.00, 24.00.

**Figure S4.**  $^1\text{H}$  NMR spectrum of ACCz-DPyM.

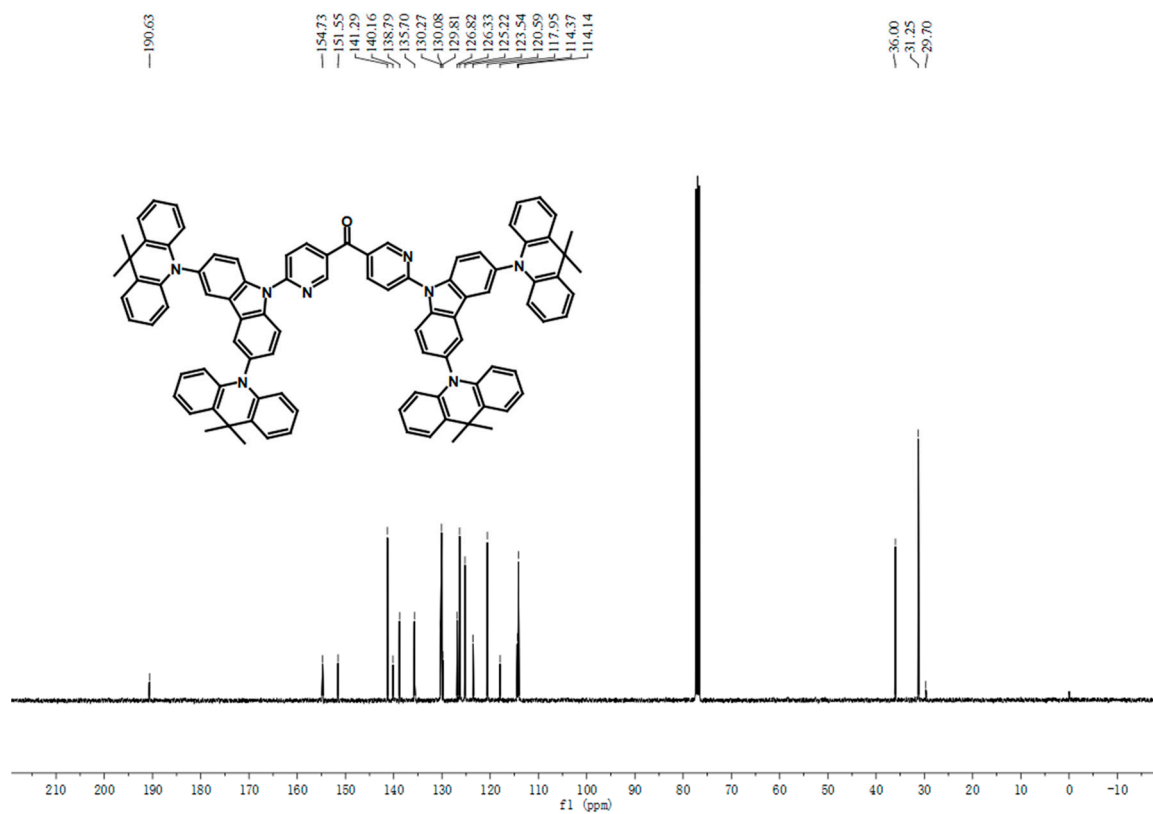

**Figure S5.**  $^{13}\text{C}$  NMR spectrum of ACCz-DPyM.

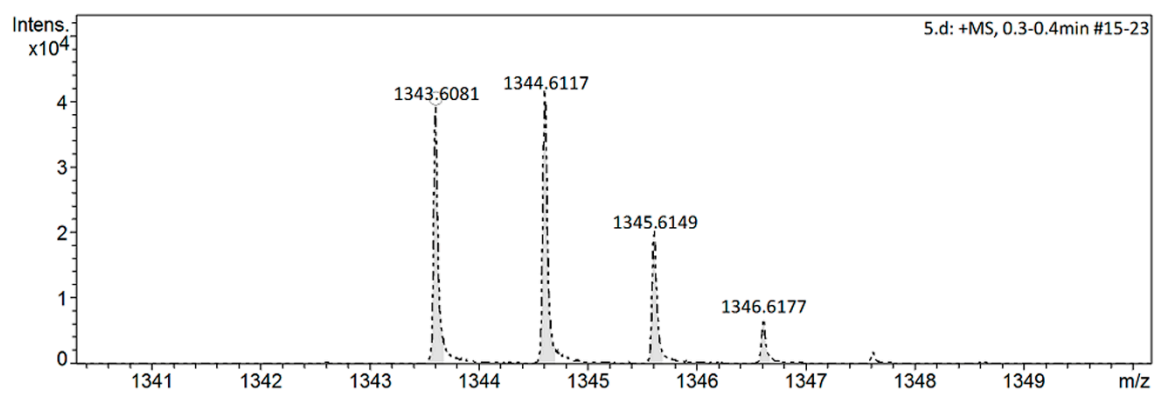

**Figure S6.** HRMS spectrum of ACCz-DPyM.

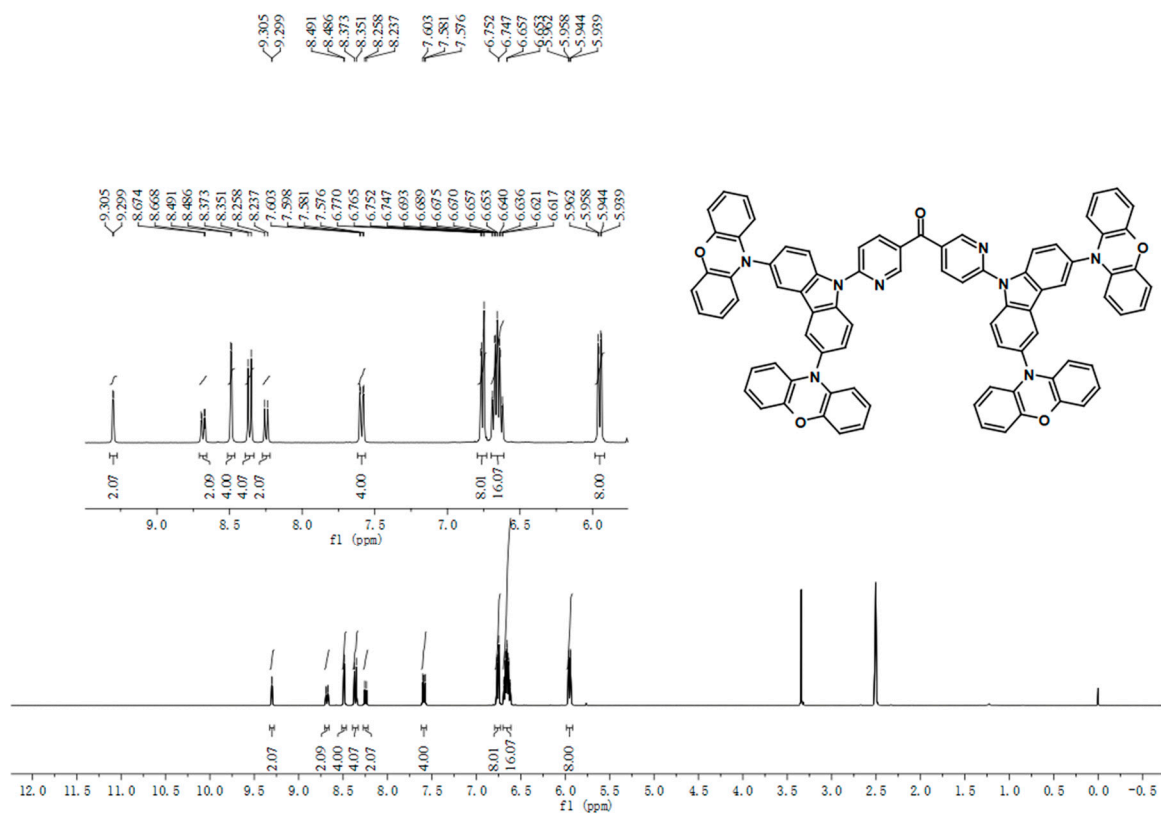

**Figure S7.** <sup>1</sup>H NMR spectrum of POxCz-DPyM.

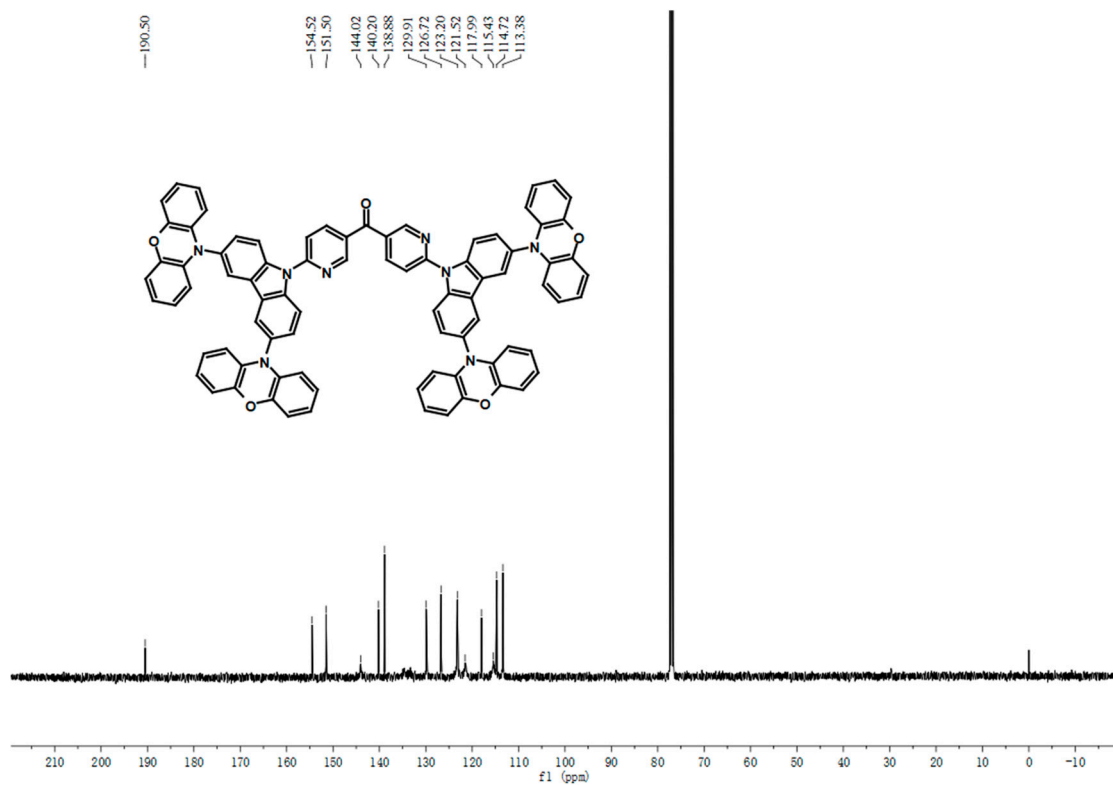

**Figure S8.** <sup>13</sup>C NMR spectrum of POxCz-DPyM.

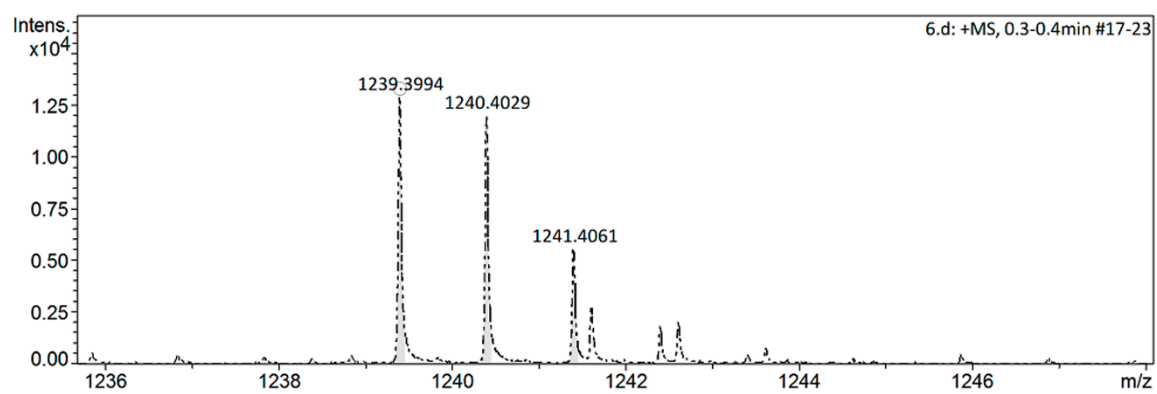

**Figure S9.** HRMS spectrum of **POxCz-DPyM**.
